# Supplementary material for: Exosomes derived from LPS-stimulated human thymic mesenchymal stromal cells enhance inflammation via thrombospondin-1
Source: PubMed Central journal article supplement (PMC8521535; doi:10.1042/bsr20203573), 2021-10-12
Supplement: BSR-2020-3573_supp.pdf [file BSR-2020-3573_supp.pdf]

(A)

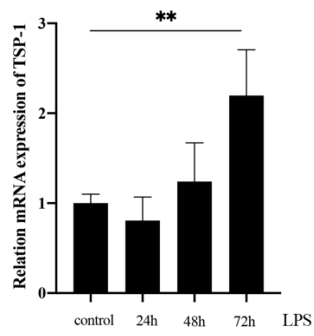

(B)

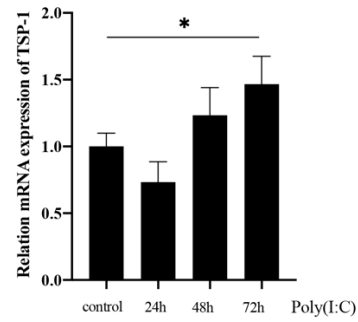

**Supplementary 1. LPS and Poly(I:C) up-regulated TSP-1 expressed by tMSC.**(A) Pretreated tMSCs were treated with LPS for 24, 48 and 72hr, using qRT-PCR to detect TSP-1 expression.(B) Pretreated tMSCs were treated with Poly(I:C) for 24, 48 and 72hr, using qRT-PCR to detect TSP-1 expression. Data were represented as the mean  $\pm$  SD of three independent experiments.\* $p < 0.05$ , \*\* $p < 0.01$ , \*\*\* $p < 0.001$ .

(A)

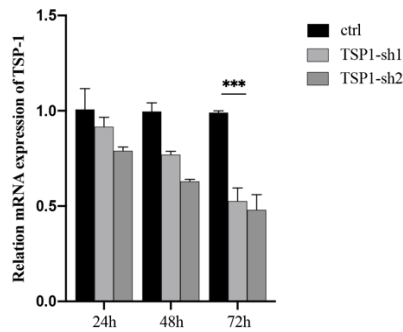

(B)

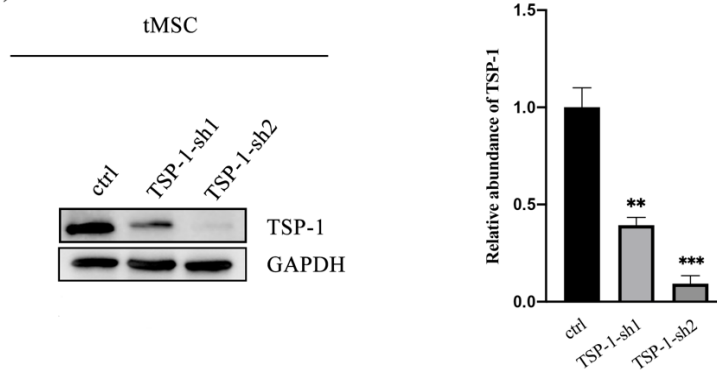

**Supplementary 2. TSP-1 lentivirus down-regulated TSP-1 expressed by tMSC.**(A) Pretreated tMSCs were treated with TSP-1-shRNA lentivirus for 24, 48 and 72hr, using qRT-PCR to detect TSP-1 expression.(B) Pretreated tMSCs were treated with TSP-1-shRNA lentivirus for 72hr, using western blot to detect TSP-1 protein expression (left) and grayscale analysis (right). Data were represented as the mean  $\pm$  SD of three independent experiments. \* $p$  < 0.05, \*\* $p$  < 0.01, \*\*\* $p$  < 0.001.

## Electron microscopy of Exosomes (more vesicles versions)

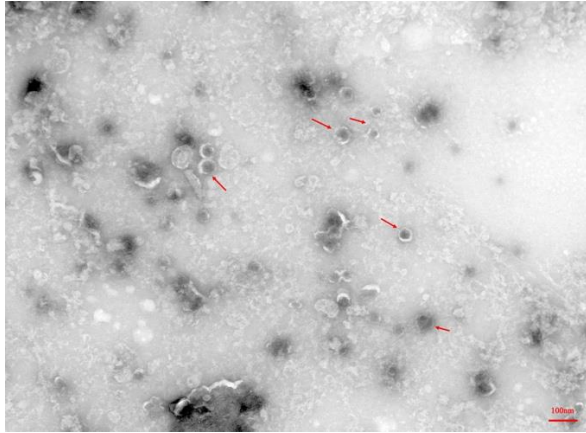

**Supplementary Figure2A Electron microscopy of Exosomes.** Electron microscopy image of isolated exosome (red arrow) derived from tMSC. Scale bar = 100 nm.
